# Supplementary material
Source: HighWire-hosted journal article supplement (https://www.cmaj.ca/highwire/filestream/147026/field_highwire_adjunct_files/3/220508-res-4-at.pdf)
Supplement: 220508-res-4-at.pdf [file 220508-res-4-at.pdf]

## Digital Supplement 2 List of Participating Research Ethics Boards

The Ottawa Health Science Network REB (REB 20150854-01H);

Children's Hospital of Eastern Ontario (CHEO) (REB 20150547)

The University of Calgary, Alberta (REB 17-2190);

The University of British Columbia Offices of Research Services Behavioural REB, British Columbia (REB H17-02811);

The University of Manitoba HREB Manitoba (REB HS21356) (H2017:409);

The Horizon Health Network REB, New Brunswick (REB 2017-2544);

Newfoundland and Labrador HREB, Newfoundland (REB 2018.035);

The Nova Scotia Health Authority (NSHA) REB, Nova Scotia (NSHA REB ROMEO File #: 1023052);

The Bureau de éthique de la recherche du CHU de Québec-Université Laval, Québec (REB 2018-4020);

The University of Saskatchewan Behavioural REB (Bet-REB), Saskatchewan (Certificate of Approval Letter Internal ID #323)
